# Supplementary material for: Relative Effects of Dietary Administration of a Competitive Exclusion Culture and a Synbiotic Product, Age and Sampling Site on Intestinal Microbiota Maturation in Broiler Chickens
Source: MDPI journal article supplement (doi:10.3390/vetsci8090187), 2021-09-06
Supplement: s1 [file s1]

## Dietary Treatments of Competitive Exclusion Culture and Synbiotic Product Influenced Gut Microbiota Maturation in Broiler Chickens

Nikoletta Such <sup>1,†</sup>, Valéria Farkas <sup>1,†</sup>, Gábor Csitári <sup>1</sup>, László Pál <sup>1</sup>, Aliz Márton <sup>1</sup>, László Menyhárt <sup>2</sup> and Károly Dublec <sup>1,\*</sup>

<sup>1</sup> Institute of Physiology and Nutrition, Hungarian University of Agriculture and Life Sciences, Georgikon Campus, 8360 Keszthely, Hungary; Deák Ferenc Street 16.; farkas.valeria@uni-mate.hu (V.F.); such.nikoletta.amanda@phd.uni-mate.hu (N.S.); csitari.gabor@uni-mate.hu (G. CS.); pal.laszlo@uni-mate.hu (L. P.); marton.aliz@uni-mate.hu (A. M.); dublec.karoly@uni-mate.hu (K. D.)

<sup>2</sup> Institute of Technology, Hungarian University of Agriculture and Life Sciences, Georgikon Campus, 8360 Keszthely, Hungary; Deák Ferenc Street 16.; menyhart.laszlo@uni-mate.hu (L.M.)

\* Correspondence: dublec.karoly@uni-mate.hu; Tel.: +36 30 6418597

† These authors contributed equally to this work.

**Table S1.** Composition and calculated nutrient content of experimental diets (g/kg) <sup>1</sup>.

| Ingredients                       | Starter        |                | Grower         |               | Finisher       |                |
|-----------------------------------|----------------|----------------|----------------|---------------|----------------|----------------|
|                                   | Basal diet     | Sy diet        | Basal diet     | Sy diet       | Basal diet     | Sy diet        |
| Maize                             | 430.80         | 425.35         | 485.80         | 480.35        | 545.30         | 539.85         |
| Extracted soybean meal            | 464.00         | 464.00         | 412.00         | 412.00        | 358.00         | 358.00         |
| Sunflower oil                     | 56.00          | 56.00          | 58.00          | 58.00         | 55.00          | 55.00          |
| Limestone                         | 18.00          | 18.00          | 15.00          | 15.00         | 14.00          | 14.00          |
| MCP                               | 16.00          | 16.00          | 15.00          | 15.00         | 14.00          | 14.00          |
| Salt                              | 3.00           | 3.00           | 3.00           | 3.00          | 3.00           | 3.00           |
| Sodium bicarbonate                | 1.00           | 1.00           | 1.00           | 1.00          | 1.00           | 1.00           |
| L-Lysine-HCl                      | 2.00           | 2.00           | 1.00           | 1.00          | 1.00           | 1.00           |
| DL-Methionine                     | 4.00           | 4.00           | 3.00           | 3.00          | 3.00           | 3.00           |
| L-Threonine                       | -              | -              | 1.00           | 1.00          | 0.50           | 0.50           |
| Premix <sup>2</sup>               | 5.00           | 5.00           | 5.00           | 5.00          | 5.00           | 5.00           |
| Phytase <sup>3</sup>              | 0.10           | 0.10           | 0.10           | 0.10          | 0.10           | 0.10           |
| Xylanase <sup>4</sup>             | 0.10           | 0.10           | 0.10           | 0.10          | 0.10           | 0.10           |
| Probiotic supplement <sup>5</sup> | -              | 0.40           | -              | 0.40          | -              | 0.40           |
| Inulin supplement <sup>6</sup>    | -              | 5.00           | -              | 5.00          | -              | 5.00           |
| Yeast supplement <sup>7</sup>     | -              | 0.05           | -              | 0.05          | -              | 0.05           |
| <i>Sum</i>                        | <i>1000.00</i> | <i>1000.00</i> | <i>1000.00</i> | <i>1000.0</i> | <i>1000.00</i> | <i>1000.00</i> |
| Calculated nutrients              |                |                |                |               |                |                |
| AMEn (MJ/kg) <sup>2</sup>         | 12.6           | 12.6           | 13.0           | 13.0          | 13.2           | 13.2           |
| Crude protein                     | 230.0          | 229.7          | 210.0          | 209.7         | 190.0          | 189.7          |
| Crude fibre                       | 28.5           | 28.4           | 27.5           | 27.4          | 26.5           | 26.4           |
| Calcium                           | 10.5           | 10.5           | 9.0            | 9.0           | 8.5            | 8.5            |
| Phosphorus (available)            | 5.0            | 5.0            | 4.5            | 4.5           | 4.2            | 4.2            |
| dig. Lysine                       | 12.7           | 12.7           | 11.0           | 11.0          | 9.7            | 9.7            |
| dig. Methionine                   | 6.5            | 6.5            | 5.7            | 5.7           | 5.1            | 5.1            |
| dig. Methionine + Cystine         | 9.4            | 9.4            | 8.4            | 8.4           | 7.6            | 7.6            |

<sup>1</sup> Basal diet was fed in the C (control) and Br ( Broilact®) treatment groups; Sy diet was supplemented with the synbiotic mixture of probiotic, inulin and yeast supplements and fed in the Sy treatment group.

<sup>2</sup>Premix was supplied by UBM Ltd. (Pilisvörösvár, Hungary). The active ingredients in the premix were as follows (per kg of diet): retinyl acetate – 5.0 mg, cholecalciferol – 130 µg, dl-alpha-tocopherol-acetate – 91 mg, menadione – 2.2 mg, thiamin – 4.5 mg, riboflavin – 10.5 mg, pyridoxin HCL – 7.5 mg, cyanocobalamin – 80 µg, niacin – 41.5 mg, pantothenic acid – 15 mg, folic acid – 1.3 mg, biotin – 150 µg, betaine – 670 mg, Ronozyme® NP – 150 mg, monensin-Na – 110 mg (only grower), narasin – 50 mg (only starter), nicarbazin – 50 mg (only starter), antioxidant – 25 mg, Zn (as ZnSO<sub>4</sub>·H<sub>2</sub>O) – 125 mg, Cu (as CuSO<sub>4</sub>·5H<sub>2</sub>O) – 20 mg, Fe (as FeSO<sub>4</sub>·H<sub>2</sub>O) – 75 mg, Mn (as MnO) – 125 mg, I (as KI) – 1.35 mg, Se (as Na<sub>2</sub>SeO<sub>3</sub>) – 270 µg;

<sup>3</sup>Quantum Blue® 5G (AB Vista, Marlborough, Wiltshire, SN8 4AN, United Kingdom)

<sup>4</sup>Econase® XT 25P (AB Vista, Marlborough, Wiltshire, SN8 4AN, United Kingdom)

<sup>5</sup>GalliPro® 200 (*Bacillus subtilis*, DSM17299 bacterial strain; 1.6x10<sup>6</sup> CFU/g, Biochem Ltd., Küstermeyerstrasse 16. 49393 Lohne, Germany)

<sup>6</sup>Orafti® HSI (Beneo Ltd., Aandorenstraat 1, B. 3300 Tienen, Belgium)

<sup>7</sup>Levucell® SB20 (*Saccharomyces cerevisiae boulardii*, 2x10<sup>10</sup> CFU/g, Lallemand Ltd., Ottakringer Str. 89, A-1160 Vienna, Austria)

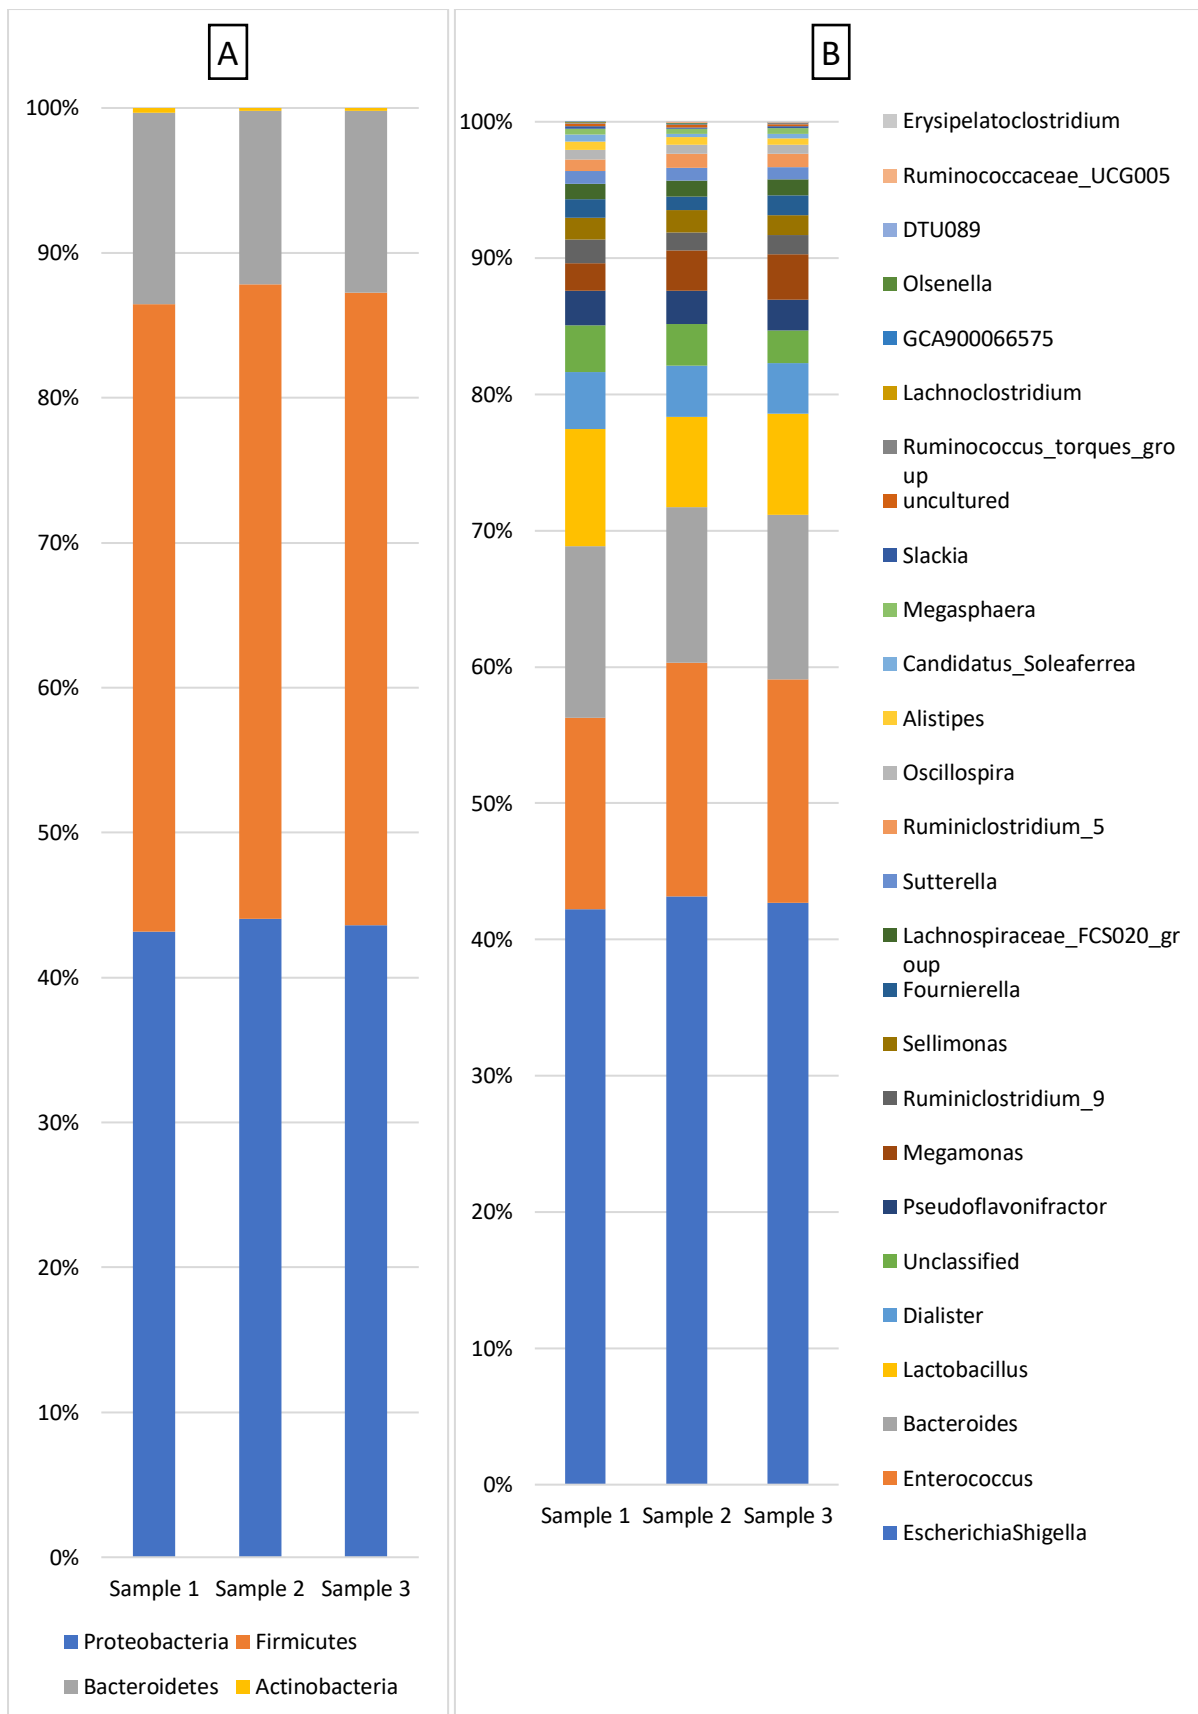

**Figure S1.** Microbial profile of Broilact®. Stacked column plots show the percent mean relative abundance of bacterial phyla (A) and genera (B).

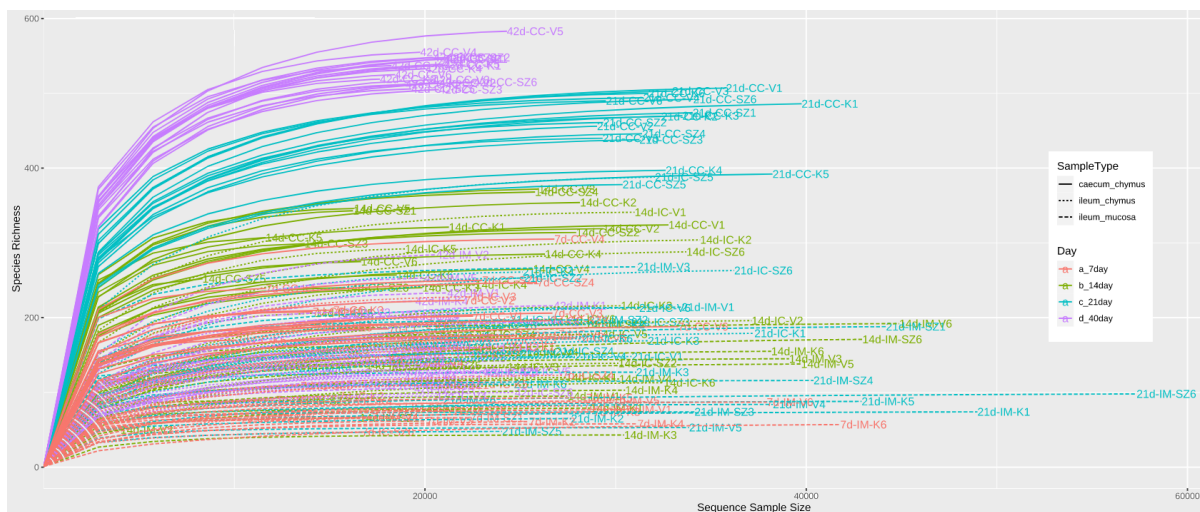

**Figure S2.** Rarefaction curves of Species richness. The observed metrics were number of Operational Taxonomic Units (OTUs). Each colored line represents the microbiota of a single chicken sample. Line color based on age of chicken; line type based on sample type (dashed: ileum mucosa; scored: ileum chymus; straight: caecum chymus). Sequence data were rarefied to a depth of 1000 sequences per sample.

**Table S2.** Alpha diversity indices of ileum chymus and effects of dietary treatments (C – Control, Br – Broilact®, Sy – Synbiotic feed additive) and age of birds on the microbiota diversity.

| Diversity Indices | Ileum Chymus      |                           |                          |                          |                          |                          | <i>p</i> -Value   |       |             |
|-------------------|-------------------|---------------------------|--------------------------|--------------------------|--------------------------|--------------------------|-------------------|-------|-------------|
|                   | Dietary Treatment | Age of Birds              |                          |                          |                          | Mean (Dietary Treatment) | Dietary Treatment | Age   | Interaction |
|                   |                   | d 7                       | d 14                     | d 21                     | d 40                     |                          |                   |       |             |
| Chao1             | C                 | 114.20 <sup>B</sup>       | 215.56                   | 195.39                   | 128.79                   | <b>163.48</b>            | 0.853             |       | 0.140       |
|                   | Br                | 175.87 <sup>A</sup>       | 200.56                   | 173.95                   | 130.69                   | <b>170.27</b>            |                   |       |             |
|                   | Sy                | 122.48 <sup>AB</sup>      | 188.36                   | 234.62                   | 138.96                   | <b>171.11</b>            |                   |       |             |
|                   | <b>Mean (Age)</b> | <b>137.52<sup>a</sup></b> | <b>201.5<sup>b</sup></b> | <b>201.3<sup>b</sup></b> | <b>132.8<sup>a</sup></b> |                          |                   | 0.001 |             |
| Shannon           | C                 | 1.94 <sup>B</sup>         | 2.60                     | 3.02                     | 2.95                     | <b>2.63</b>              | 0.678             |       | 0.011       |
|                   | Br                | 2.96 <sup>A</sup>         | 2.61                     | 2.86                     | 2.46                     | <b>2.73</b>              |                   |       |             |
|                   | Sy                | 2.37 <sup>AB</sup>        | 2.54                     | 3.23                     | 2.80                     | <b>2.73</b>              |                   |       |             |
|                   | <b>Mean (Age)</b> | <b>2.42<sup>a</sup></b>   | <b>2.58<sup>a</sup></b>  | <b>3.04<sup>b</sup></b>  | <b>2.74<sup>ab</sup></b> |                          |                   | 0.002 |             |
| Simpson           | C                 | 0.69 <sup>B</sup>         | 0.79                     | 0.89                     | 0.90                     | <b>0.82</b>              | 0.501             |       | 0.024       |
|                   | Br                | 0.89 <sup>A</sup>         | 0.82                     | 0.87                     | 0.81                     | <b>0.85</b>              |                   |       |             |
|                   | Sy                | 0.81 <sup>AB</sup>        | 0.79                     | 0.91                     | 0.86                     | <b>0.84</b>              |                   |       |             |
|                   | <b>Mean (Age)</b> | <b>0.80<sup>a</sup></b>   | <b>0.80<sup>a</sup></b>  | <b>0.89<sup>b</sup></b>  | <b>0.86<sup>ab</sup></b> |                          |                   | 0.009 |             |

Averages of the columns with different capital letter superscripts and values within the mean rows with different lowercase letters are significantly different ( $p < 0.05$ ).

**Table S3.** Alpha diversity indices in ileum mucosa and effects of dietary treatments and age of birds on the microbiota diversity.

| Diversity Indices | Ileum Mucosa      |                           |                            |                            |                            |                          | <i>p</i> -Value   |       |             |
|-------------------|-------------------|---------------------------|----------------------------|----------------------------|----------------------------|--------------------------|-------------------|-------|-------------|
|                   | Dietary Treatment | Age of Birds              |                            |                            |                            | Mean (Dietary Treatment) | Dietary Treatment | Age   | Interaction |
|                   |                   | d 7                       | d 14                       | d 21                       | d 40                       |                          |                   |       |             |
| Chao1             | C                 | 73.34                     | 113.38                     | 99.91                      | 186.95 <sup>A</sup>        | <b>118.39</b>            | 0.051             |       | 0.060       |
|                   | Br                | 75.32                     | 123.31                     | 143.84                     | 226.45 <sup>A</sup>        | <b>142.23</b>            |                   |       |             |
|                   | Sy                | 80.40                     | 122.56                     | 120.66                     | 128.18 <sup>B</sup>        | <b>112.95</b>            |                   |       |             |
|                   | <b>Mean (Age)</b> | <b>76.36</b> <sup>a</sup> | <b>119.75</b> <sup>a</sup> | <b>121.47</b> <sup>b</sup> | <b>180.53</b> <sup>c</sup> |                          |                   | 0.001 |             |
| Shannon           | C                 | 0.73                      | 1.09                       | 1.58                       | 3.02 <sup>A</sup>          | <b>1.60</b>              | 0.886             |       | 0.036       |
|                   | Br                | 0.89                      | 1.22                       | 1.91                       | 2.73 <sup>AB</sup>         | <b>1.69</b>              |                   |       |             |
|                   | Sy                | 1.73                      | 1.45                       | 0.96                       | 2.62 <sup>B</sup>          | <b>1.69</b>              |                   |       |             |
|                   | <b>Mean (Age)</b> | <b>1.12</b> <sup>a</sup>  | <b>1.25</b> <sup>a</sup>   | <b>1.48</b> <sup>a</sup>   | <b>2.79</b> <sup>b</sup>   |                          |                   | 0.001 |             |
| Simpson           | C                 | 0.27                      | 0.31                       | 0.45                       | 0.89                       | <b>0.48</b>              | 0.643             |       | 0.037       |
|                   | Br                | 0.29                      | 0.38                       | 0.57                       | 0.85                       | <b>0.52</b>              |                   |       |             |
|                   | Sy                | 0.55                      | 0.44                       | 0.27                       | 0.86                       | <b>0.53</b>              |                   |       |             |
|                   | <b>Mean (Age)</b> | <b>0.37</b> <sup>a</sup>  | <b>0.38</b> <sup>a</sup>   | <b>0.43</b> <sup>a</sup>   | <b>0.87</b> <sup>b</sup>   |                          |                   | 0.001 |             |

Averages of the columns with different capital letter superscripts and values within the mean rows with different lowercase letters are significantly different ( $p < 0.05$ ).

**Table S4.** Alpha diversity indices in caecum chymus and effects of dietary treatments and age of birds on the microbiota diversity.

| Diversity Indices | Caecum Chymus     |                            |                            |                            |                            |                            | <i>p</i> -Value   |       |             |
|-------------------|-------------------|----------------------------|----------------------------|----------------------------|----------------------------|----------------------------|-------------------|-------|-------------|
|                   | Dietary Treatment | Age of Birds               |                            |                            |                            | Mean (Dietary Treatment)   | Dietary Treatment | Age   | Interaction |
|                   |                   | d 7                        | d 14                       | d 21                       | d 40                       |                            |                   |       |             |
| Chao1             | C                 | 201.74                     | 294.96                     | 453.91                     | 530.71                     | <b>370.33</b>              | 0.124             |       | 0.983       |
|                   | Br                | 216.81                     | 317.95                     | 483.32                     | 542.08                     | <b>390.04</b>              |                   |       |             |
|                   | Sy                | 207.32                     | 303.37                     | 449.33                     | 529.75                     | <b>372.44</b>              |                   |       |             |
|                   | <b>Mean (Age)</b> | <b>208.63</b> <sup>a</sup> | <b>305.43</b> <sup>b</sup> | <b>462.19</b> <sup>c</sup> | <b>534.18</b> <sup>d</sup> |                            |                   | 0.001 |             |
| Shannon           | C                 | 3.79                       | 4.18                       | 4.34                       | 4.77                       | <b>4.27</b>                | 0.119             |       | 0.372       |
|                   | Br                | 3.51                       | 4.12                       | 4.34                       | 4.59                       | <b>4.14</b>                |                   |       |             |
|                   | Sy                | 3.82                       | 4.14                       | 4.24                       | 4.70                       | <b>4.23</b>                |                   |       |             |
|                   | <b>Mean (Age)</b> | <b>3.71</b> <sup>a</sup>   | <b>4.15</b> <sup>b</sup>   | <b>4.31</b> <sup>b</sup>   | <b>4.69</b> <sup>c</sup>   |                            |                   | 0.001 |             |
| Simpson           | C                 | 0.948                      | 0.963                      | 0.962                      | 0.978                      | <b>0.963</b> <sup>A</sup>  | 0.024             |       | 0.232       |
|                   | Br                | 0.930                      | 0.962                      | 0.955                      | 0.966                      | <b>0.953</b> <sup>B</sup>  |                   |       |             |
|                   | Sy                | 0.952                      | 0.960                      | 0.950                      | 0.977                      | <b>0.960</b> <sup>AB</sup> |                   |       |             |
|                   | <b>Mean (Age)</b> | <b>0.943</b> <sup>a</sup>  | <b>0.962</b> <sup>bc</sup> | <b>0.955</b> <sup>b</sup>  | <b>0.974</b> <sup>c</sup>  |                            |                   | 0.001 |             |

Averages of the columns with different capital letter superscripts and values within the mean rows with different lowercase letters are significantly different ( $p < 0.05$ ).

**Table S5.** Relative abundance of Ileum chymus microbiota at phylum level.

| Phylum          | Ileum Chymus (%)  |                           |                          |                           |                          |                          | FDR <i>p</i> -Value |       |             |
|-----------------|-------------------|---------------------------|--------------------------|---------------------------|--------------------------|--------------------------|---------------------|-------|-------------|
|                 | Dietary Treatment | Age of Birds              |                          |                           |                          | Mean (Dietary Treatment) | Dietary Treatment   | Age   | Interaction |
|                 |                   | d 7                       | d 14                     | d 21                      | d 40                     |                          |                     |       |             |
| Firmicutes      | C                 | 96.49 <sup>A</sup>        | 91.68                    | 92.65                     | 94.80                    | <b>93.91</b>             | 0.180               |       | 0.032       |
|                 | Br                | 83.95 <sup>B</sup>        | 75.59                    | 95.09                     | 96.31                    | <b>87.74</b>             |                     |       |             |
|                 | Sy                | 92.01 <sup>AB</sup>       | 91.39                    | 89.72                     | 92.66                    | <b>91.45</b>             |                     |       |             |
|                 | <b>Mean (Age)</b> | <b>90.82<sup>ab</sup></b> | <b>86.22<sup>b</sup></b> | <b>92.49<sup>ab</sup></b> | <b>94.59<sup>a</sup></b> |                          |                     | 0.055 |             |
| Proteobacteria  | C                 | 1.48                      | 2.08                     | 0.73 <sup>A</sup>         | 0.19                     | <b>1.12</b>              | 0.060               |       | 0.083       |
|                 | Br                | 10.85                     | 17.07                    | 0.15 <sup>B</sup>         | 0.20                     | <b>7.07</b>              |                     |       |             |
|                 | Sy                | 2.09                      | 2.15                     | 0.18 <sup>AB</sup>        | 0.43                     | <b>1.21</b>              |                     |       |             |
|                 | <b>Mean (Age)</b> | <b>4.81<sup>ab</sup></b>  | <b>7.10<sup>a</sup></b>  | <b>0.35<sup>b</sup></b>   | <b>0.27<sup>b</sup></b>  |                          |                     | 0.026 |             |
| Cyanobacteria   | C                 | 1.93 <sup>B</sup>         | 3.32                     | 0.12 <sup>B</sup>         | 0.33                     | <b>1.43</b>              | 0.110               |       | 0.390       |
|                 | Br                | 4.35 <sup>AB</sup>        | 5.74                     | 0.08 <sup>AB</sup>        | 0.11                     | <b>2.57</b>              |                     |       |             |
|                 | Sy                | 5.49 <sup>A</sup>         | 5.39                     | 0.18 <sup>A</sup>         | 0.24                     | <b>3.16</b>              |                     |       |             |
|                 | <b>Mean (Age)</b> | <b>3.92<sup>a</sup></b>   | <b>4.82<sup>a</sup></b>  | <b>0.13<sup>b</sup></b>   | <b>0.23<sup>b</sup></b>  |                          |                     | 0.001 |             |
| Actinobacteria  | C                 | 0.05                      | 0.15                     | 6.08                      | 4.33                     | <b>2.65</b>              | 0.540               |       | 0.830       |
|                 | Br                | 0.65                      | 0.09                     | 4.44                      | 3.11                     | <b>2.07</b>              |                     |       |             |
|                 | Sy                | 0.12                      | 0.26                     | 8.74                      | 5.05                     | <b>3.54</b>              |                     |       |             |
|                 | <b>Mean (Age)</b> | <b>0.27<sup>b</sup></b>   | <b>0.17<sup>b</sup></b>  | <b>6.42<sup>a</sup></b>   | <b>4.16<sup>a</sup></b>  |                          |                     | 0.001 |             |
| Bacteroidetes   | C                 | 0.03 <sup>B</sup>         | 2.53                     | 0.15                      | 0.00                     | <b>0.68</b>              | 0.360               |       | 0.008       |
|                 | Br                | 0.06 <sup>AB</sup>        | 0.19                     | 0.12                      | 0.04                     | <b>0.10</b>              |                     |       |             |
|                 | Sy                | 0.12 <sup>A</sup>         | 0.39                     | 1.08                      | 0.01                     | <b>0.40</b>              |                     |       |             |
|                 | <b>Mean (Age)</b> | <b>0.07<sup>b</sup></b>   | <b>1.04<sup>a</sup></b>  | <b>0.45<sup>ab</sup></b>  | <b>0.02<sup>b</sup></b>  |                          |                     | 0.024 |             |
| Patescibacteria | C                 | 0.00                      | 0.20                     | 0.08                      | 0.34                     | <b>0.16</b>              | 0.360               |       | 0.036       |
|                 | Br                | 0.07                      | 1.29                     | 0.06                      | 0.23                     | <b>0.41</b>              |                     |       |             |
|                 | Sy                | 0.12                      | 0.21                     | 0.08                      | 0.34                     | <b>0.19</b>              |                     |       |             |
|                 | <b>Mean (Age)</b> | <b>0.06<sup>b</sup></b>   | <b>0.57<sup>a</sup></b>  | <b>0.07<sup>b</sup></b>   | <b>0.30<sup>ab</sup></b> |                          |                     | 0.026 |             |
| Verrucomicrobia | C                 | 0.00                      | 0.00                     | 0.17                      | 0.00                     | <b>0.04</b>              | 0.640               |       | 0.820       |
|                 | Br                | 0.00                      | 0.00                     | 0.06                      | 0.00                     | <b>0.02</b>              |                     |       |             |
|                 | Sy                | 0.00                      | 0.00                     | 0.16                      | 0.00                     | <b>0.04</b>              |                     |       |             |
|                 | <b>Mean (Age)</b> | <b>0.00<sup>b</sup></b>   | <b>0.001<sup>b</sup></b> | <b>0.13<sup>a</sup></b>   | <b>0.001<sup>b</sup></b> |                          |                     | 0.003 |             |
| Tenericutes     | C                 | 0.01                      | 0.03                     | 0.02                      | 0.00                     | <b>0.02</b>              | 0.610               |       | 0.650       |
|                 | Br                | 0.03                      | 0.02                     | 0.00                      | 0.00                     | <b>0.01</b>              |                     |       |             |
|                 | Sy                | 0.00                      | 0.01                     | 0.01                      | 0.00                     | <b>0.01</b>              |                     |       |             |
|                 | <b>Mean (Age)</b> | <b>0.01</b>               | <b>0.02</b>              | <b>0.01</b>               | <b>0.00</b>              |                          |                     | 0.260 |             |
| Armatimonadetes | C                 | 0.01                      | 0.00                     | 0.00                      | 0.00                     | <b>0.00</b>              | 0.410               |       | 0.210       |
|                 | Br                | 0.04                      | 0.00                     | 0.00                      | 0.00                     | <b>0.01</b>              |                     |       |             |
|                 | Sy                | 0.04                      | 0.00                     | 0.00                      | 0.00                     | <b>0.01</b>              |                     |       |             |
|                 | <b>Mean (Age)</b> | <b>0.03<sup>a</sup></b>   | <b>0.00<sup>b</sup></b>  | <b>0.00<sup>b</sup></b>   | <b>0.00<sup>b</sup></b>  |                          |                     | 0.001 |             |
| Chloroflexi     | C                 | 0.00                      | 0.00                     | 0.00                      | 0.00                     | <b>0.00</b>              | 0.490               |       | 0.430       |
|                 | Br                | 0.00                      | 0.00                     | 0.00                      | 0.00                     | <b>0.00</b>              |                     |       |             |
|                 | Sy                | 0.00                      | 0.00                     | 0.00                      | 0.00                     | <b>0.00</b>              |                     |       |             |
|                 | <b>Mean (Age)</b> | <b>0.00</b>               | <b>0.00</b>              | <b>0.00</b>               | <b>0.00</b>              |                          |                     | 0.400 |             |

Averages of the columns with different capital letter superscripts and values within the mean rows with different lowercase letters are significantly different ( $p < 0.05$ ).

**Table S6.** Relative abundance of Ileum mucosa microbiota at phylum level.

| Phylum              | Ileum Mucosa (%)  |                          |                         |                          |                         |                          | FDR <i>p</i> -Value |       |             |
|---------------------|-------------------|--------------------------|-------------------------|--------------------------|-------------------------|--------------------------|---------------------|-------|-------------|
|                     | Dietary Treatment | Age of Birds             |                         |                          |                         | Mean (Dietary Treatment) | Dietary Treatment   | Age   | Interaction |
|                     |                   | d 7                      | d 14                    | d 21                     | d 40                    |                          |                     |       |             |
| Firmicutes          | C                 | 98.77 <sup>A</sup>       | 95.35                   | 92.57                    | 96.11                   | <b>95.70</b>             | 0.710               |       | 0.042       |
|                     | Br                | 96.30 <sup>AB</sup>      | 93.21                   | 95.09                    | 97.72                   | <b>95.58</b>             |                     |       |             |
|                     | Sy                | 91.84 <sup>B</sup>       | 92.72                   | 96.13                    | 97.86                   | <b>94.64</b>             |                     |       |             |
|                     | <b>Mean (Age)</b> | <b>95.64</b>             | <b>93.76</b>            | <b>94.60</b>             | <b>97.23</b>            |                          |                     | 0.140 |             |
| Proteobacteria      | C                 | 0.90 <sup>B</sup>        | 3.19                    | 5.83                     | 1.56                    | <b>2.87</b>              | 0.860               |       | 0.021       |
|                     | Br                | 2.94 <sup>AB</sup>       | 5.30                    | 2.78                     | 0.52                    | <b>2.89</b>              |                     |       |             |
|                     | Sy                | 6.03 <sup>A</sup>        | 5.07                    | 2.15                     | 0.61                    | <b>3.47</b>              |                     |       |             |
|                     | <b>Mean (Age)</b> | <b>3.29<sup>ab</sup></b> | <b>4.52<sup>a</sup></b> | <b>3.59<sup>ab</sup></b> | <b>0.90<sup>b</sup></b> |                          |                     | 0.030 |             |
| Actinobacteria      | C                 | 0.23 <sup>B</sup>        | 0.34                    | 0.62                     | 1.80                    | <b>0.75</b>              | 0.710               |       | 0.120       |
|                     | Br                | 0.60 <sup>AB</sup>       | 0.63                    | 0.32                     | 0.92                    | <b>0.62</b>              |                     |       |             |
|                     | Sy                | 1.26 <sup>A</sup>        | 0.58                    | 0.47                     | 1.10                    | <b>0.85</b>              |                     |       |             |
|                     | <b>Mean (Age)</b> | <b>0.70<sup>ab</sup></b> | <b>0.52<sup>b</sup></b> | <b>0.47<sup>b</sup></b>  | <b>1.27<sup>a</sup></b> |                          |                     | 0.060 |             |
| Bacteroidetes       | C                 | 0.02                     | 0.65                    | 0.44                     | 0.14                    | <b>0.31</b>              | 0.880               |       | 0.540       |
|                     | Br                | 0.01                     | 0.13                    | 1.21                     | 0.64                    | <b>0.50</b>              |                     |       |             |
|                     | Sy                | 0.00                     | 0.20                    | 1.02                     | 0.07                    | <b>0.32</b>              |                     |       |             |
|                     | <b>Mean (Age)</b> | <b>0.01</b>              | <b>0.33</b>             | <b>0.89</b>              | <b>0.28</b>             |                          |                     | 0.140 |             |
| Cyanobacteria       | C                 | 0.08 <sup>B</sup>        | 0.35                    | 0.00                     | 0.14                    | <b>0.14</b>              | 0.120               |       | 0.041       |
|                     | Br                | 0.14 <sup>B</sup>        | 0.58                    | 0.14                     | 0.08                    | <b>0.24</b>              |                     |       |             |
|                     | Sy                | 0.85 <sup>A</sup>        | 1.00                    | 0.01                     | 0.10                    | <b>0.49</b>              |                     |       |             |
|                     | <b>Mean (Age)</b> | <b>0.36<sup>ab</sup></b> | <b>0.64<sup>a</sup></b> | <b>0.05<sup>b</sup></b>  | <b>0.11<sup>b</sup></b> |                          |                     | 0.001 |             |
| Patescibacteria     | C                 | 0.00                     | 0.02                    | 0.00                     | 0.23                    | <b>0.06</b>              | 0.710               |       | 0.630       |
|                     | Br                | 0.00                     | 0.11                    | 0.04                     | 0.10                    | <b>0.06</b>              |                     |       |             |
|                     | Sy                | 0.00                     | 0.35                    | 0.00                     | 0.25                    | <b>0.15</b>              |                     |       |             |
|                     | <b>Mean (Age)</b> | <b>0.00</b>              | <b>0.16</b>             | <b>0.01</b>              | <b>0.19</b>             |                          |                     | 0.140 |             |
| Verrucomicrobia     | C                 | 0.00                     | 0.00                    | 0.33                     | 0.01                    | <b>0.09</b>              | 0.880               |       | 0.990       |
|                     | Br                | 0.00                     | 0.00                    | 0.36                     | 0.01                    | <b>0.09</b>              |                     |       |             |
|                     | Sy                | 0.00                     | 0.01                    | 0.19                     | 0.00                    | <b>0.05</b>              |                     |       |             |
|                     | <b>Mean (Age)</b> | <b>0.00<sup>b</sup></b>  | <b>0.00<sup>b</sup></b> | <b>0.29<sup>a</sup></b>  | <b>0.01<sup>b</sup></b> |                          |                     | 0.060 |             |
| Tenericutes         | C                 | 0.00                     | 0.04                    | 0.16                     | 0.01                    | <b>0.05</b>              | 0.710               |       | 0.780       |
|                     | Br                | 0.00                     | 0.04                    | 0.05                     | 0.01                    | <b>0.03</b>              |                     |       |             |
|                     | Sy                | 0.00                     | 0.07                    | 0.02                     | 0.00                    | <b>0.02</b>              |                     |       |             |
|                     | <b>Mean (Age)</b> | <b>0.00</b>              | <b>0.05</b>             | <b>0.08</b>              | <b>0.01</b>             |                          |                     | 0.210 |             |
| Deinococcus_Thermus | C                 | 0.00                     | 0.00                    | 0.04                     | 0.00                    | <b>0.01</b>              | 0.710               |       | 0.540       |
|                     | Br                | 0.00                     | 0.00                    | 0.00                     | 0.00                    | <b>0.00</b>              |                     |       |             |
|                     | Sy                | 0.00                     | 0.00                    | 0.01                     | 0.01                    | <b>0.01</b>              |                     |       |             |
|                     | <b>Mean (Age)</b> | <b>0.00</b>              | <b>0.00</b>             | <b>0.02</b>              | <b>0.00</b>             |                          |                     | 0.400 |             |
| Chloroflexi         | C                 | 0.00                     | 0.01                    | 0.00                     | 0.00                    | <b>0.00</b>              | 0.790               |       | 0.610       |
|                     | Br                | 0.01                     | 0.00                    | 0.00                     | 0.00                    | <b>0.00</b>              |                     |       |             |
|                     | Sy                | 0.00                     | 0.00                    | 0.00                     | 0.00                    | <b>0.00</b>              |                     |       |             |
|                     | <b>Mean (Age)</b> | <b>0.00</b>              | <b>0.00</b>             | <b>0.00</b>              | <b>0.00</b>             |                          |                     | 0.210 |             |

Averages of the columns with different capital letter superscripts and values within the mean rows with different lowercase letters are significantly different ( $p < 0.05$ ).

**Table S7.** Relative abundance of caecum chymus microbiota at phylum level.

| Phylum          | Caecum Chymus (%) |                          |                          |                          |                          |                          | FDR <i>p</i> -Value |       |             |
|-----------------|-------------------|--------------------------|--------------------------|--------------------------|--------------------------|--------------------------|---------------------|-------|-------------|
|                 | Dietary Treatment | Age of Birds             |                          |                          |                          | Mean (Dietary Treatment) | Dietary Treatment   | Day   | Interaction |
|                 |                   | d 7                      | d 14                     | d 21                     | d 40                     |                          |                     |       |             |
| Firmicutes      | C                 | 88.60                    | 86.21                    | 83.19                    | 85.66                    | <b>85.92</b>             | 0.940               |       | 0.740       |
|                 | Br                | 90.19                    | 84.49                    | 80.66                    | 86.13                    | <b>85.37</b>             |                     |       |             |
|                 | Sy                | 86.47                    | 87.25                    | 77.98                    | 87.05                    | <b>84.69</b>             |                     |       |             |
|                 | <b>Mean (Age)</b> | <b>88.42<sup>a</sup></b> | <b>85.98<sup>a</sup></b> | <b>80.61<sup>b</sup></b> | <b>86.28<sup>a</sup></b> |                          |                     | 0.003 |             |
| Proteobacteria  | C                 | 5.50                     | 1.65                     | 0.59                     | 1.02                     | <b>2.19</b>              | 0.940               |       | 0.730       |
|                 | Br                | 8.22                     | 3.88                     | 0.46                     | 0.87                     | <b>3.36</b>              |                     |       |             |
|                 | Sy                | 10.22                    | 1.96                     | 0.73                     | 1.05                     | <b>3.49</b>              |                     |       |             |
|                 | <b>Mean (Age)</b> | <b>7.98<sup>a</sup></b>  | <b>2.50<sup>b</sup></b>  | <b>0.59<sup>b</sup></b>  | <b>0.98<sup>b</sup></b>  |                          |                     | 0.001 |             |
| Bacteroidetes   | C                 | 0.01                     | 9.61                     | 13.02                    | 11.82                    | <b>8.62</b>              | 0.940               |       | 0.700       |
|                 | Br                | 0.06                     | 7.10                     | 15.29                    | 11.26                    | <b>8.43</b>              |                     |       |             |
|                 | Sy                | 0.00                     | 8.62                     | 17.60                    | 9.92                     | <b>9.04</b>              |                     |       |             |
|                 | <b>Mean (Age)</b> | <b>0.02<sup>c</sup></b>  | <b>8.44<sup>b</sup></b>  | <b>15.30<sup>a</sup></b> | <b>11.00<sup>b</sup></b> |                          |                     | 0.001 |             |
| Tenericutes     | C                 | 5.86                     | 2.01                     | 0.34                     | 0.33                     | <b>2.14</b>              | 0.940               |       | 0.160       |
|                 | Br                | 1.49                     | 2.53                     | 0.62                     | 0.33                     | <b>1.24</b>              |                     |       |             |
|                 | Sy                | 3.29                     | 1.92                     | 0.46                     | 0.28                     | <b>1.49</b>              |                     |       |             |
|                 | <b>Mean (Age)</b> | <b>3.55<sup>a</sup></b>  | <b>2.15<sup>ab</sup></b> | <b>0.47<sup>b</sup></b>  | <b>0.31<sup>b</sup></b>  |                          |                     | 0.001 |             |
| Cyanobacteria   | C                 | 0.00                     | 0.45                     | 0.18                     | 0.59                     | <b>0.31</b>              | 0.940               |       | 0.280       |
|                 | Br                | 0.00                     | 1.93                     | 0.08                     | 0.56                     | <b>0.64</b>              |                     |       |             |
|                 | Sy                | 0.00                     | 0.18                     | 0.20                     | 0.67                     | <b>0.26</b>              |                     |       |             |
|                 | <b>Mean (Age)</b> | <b>0.00</b>              | <b>0.85</b>              | <b>0.15</b>              | <b>0.61</b>              |                          |                     | 0.073 |             |
| Actinobacteria  | C                 | 0.03                     | 0.07                     | 0.10                     | 0.07                     | <b>0.07</b>              | 0.940               |       | 0.230       |
|                 | Br                | 0.03                     | 0.05                     | 0.11                     | 0.07                     | <b>0.07</b>              |                     |       |             |
|                 | Sy                | 0.03                     | 0.04                     | 0.15                     | 0.19                     | <b>0.10</b>              |                     |       |             |
|                 | <b>Mean (Age)</b> | <b>0.03<sup>b</sup></b>  | <b>0.05<sup>ab</sup></b> | <b>0.12<sup>a</sup></b>  | <b>0.11<sup>a</sup></b>  |                          |                     | 0.002 |             |
| Verrucomicrobia | C                 | 0.00                     | 0.00                     | 2.59                     | 0.49                     | <b>0.77</b>              | 0.940               |       | 1.000       |
|                 | Br                | 0.00                     | 0.01                     | 2.78                     | 0.77                     | <b>0.89</b>              |                     |       |             |
|                 | Sy                | 0.00                     | 0.04                     | 2.89                     | 0.82                     | <b>0.94</b>              |                     |       |             |
|                 | <b>Mean (Age)</b> | <b>0.00<sup>b</sup></b>  | <b>0.02<sup>b</sup></b>  | <b>2.75<sup>a</sup></b>  | <b>0.69<sup>b</sup></b>  |                          |                     | 0.001 |             |
| Patescibacteria | C                 | 0.00                     | 0.00                     | 0.00                     | 0.02                     | <b>0.01</b>              | 0.940               |       | 0.580       |
|                 | Br                | 0.00                     | 0.00                     | 0.00                     | 0.01                     | <b>0.00</b>              |                     |       |             |
|                 | Sy                | 0.00                     | 0.00                     | 0.00                     | 0.02                     | <b>0.01</b>              |                     |       |             |
|                 | <b>Mean (Age)</b> | <b>0.00<sup>b</sup></b>  | <b>0.00<sup>b</sup></b>  | <b>0.00<sup>b</sup></b>  | <b>0.02<sup>a</sup></b>  |                          |                     | 0.001 |             |

Averages of the columns with different capital letter superscripts and values within the mean rows with different lowercase letters are significantly different ( $p < 0.05$ ).



**Table S8.** Relative abundance of Ileum chymus microbiota at genus level.

| Genus                              | Ileum Chymus (%)  |                           |                          |                          |                           |                          | FDR p-Value       |       |             |
|------------------------------------|-------------------|---------------------------|--------------------------|--------------------------|---------------------------|--------------------------|-------------------|-------|-------------|
|                                    | Dietary Treatment | Age of Birds              |                          |                          |                           | Mean (Dietary Treatment) | Dietary Treatment | Age   | Interaction |
|                                    |                   | d 7                       | d 14                     | d 21                     | d 40                      |                          |                   |       |             |
| <i>Lactobacillus</i>               | C                 | 79.43 <sup>A</sup>        | 61.30                    | 63.68                    | 60.68                     | <b>66.27</b>             | 0.820             |       | 0.030       |
|                                    | Br                | 49.84 <sup>B</sup>        | 45.53                    | 69.02                    | 76.02                     | <b>60.10</b>             |                   |       |             |
|                                    | Sy                | 75.19 <sup>AB</sup>       | 56.34                    | 51.58                    | 67.25                     | <b>62.59</b>             |                   |       |             |
|                                    | Mean (Age)        | <b>68.15</b>              | <b>54.39</b>             | <b>61.43</b>             | <b>67.99</b>              |                          |                   | 0.150 |             |
| <i>Enterococcus</i>                | C                 | 1.74 <sup>B</sup>         | 0.47                     | 1.42                     | 1.14                      | <b>1.19</b>              | 0.800             |       | 0.011       |
|                                    | Br                | 18.17 <sup>A</sup>        | 0.32                     | 1.88                     | 0.91                      | <b>5.32</b>              |                   |       |             |
|                                    | Sy                | 13.76 <sup>AB</sup>       | 1.69                     | 2.19                     | 1.74                      | <b>4.84</b>              |                   |       |             |
|                                    | Mean (Age)        | <b>11.22 <sup>a</sup></b> | <b>0.82 <sup>b</sup></b> | <b>1.83 <sup>b</sup></b> | <b>1.26 <sup>b</sup></b>  |                          |                   | 0.001 |             |
| <i>Escherichia-Shigella</i>        | C                 | 0.80                      | 1.49                     | 0.58 <sup>A</sup>        | 0.17                      | <b>0.76</b>              | 0.710             |       | 0.079       |
|                                    | Br                | 9.44                      | 16.66                    | 0.06 <sup>B</sup>        | 0.16                      | <b>6.58</b>              |                   |       |             |
|                                    | Sy                | 0.07                      | 1.55                     | 0.13 <sup>AB</sup>       | 0.30                      | <b>0.51</b>              |                   |       |             |
|                                    | Mean (Age)        | <b>3.44</b>               | <b>6.57</b>              | <b>0.26</b>              | <b>0.21</b>               |                          |                   | 0.081 |             |
| <i>Subdoligranulum</i>             | C                 | 3.19                      | 0.14                     | 0.07                     | 0.01                      | <b>0.85</b>              | 0.820             |       | 0.730       |
|                                    | Br                | 2.48                      | 0.23                     | 0.03                     | 0.01                      | <b>0.69</b>              |                   |       |             |
|                                    | Sy                | 0.11                      | 0.31                     | 0.14                     | 0.06                      | <b>0.15</b>              |                   |       |             |
|                                    | Mean (Age)        | <b>1.92</b>               | <b>0.23</b>              | <b>0.08</b>              | <b>0.03</b>               |                          |                   | 0.170 |             |
| <i>Streptococcus</i>               | C                 | 1.71                      | 3.65                     | 2.90                     | 11.95                     | <b>5.05</b>              | 0.800             |       | 0.830       |
|                                    | Br                | 1.26                      | 0.80                     | 2.68                     | 6.39                      | <b>2.78</b>              |                   |       |             |
|                                    | Sy                | 0.16                      | 1.54                     | 2.96                     | 7.24                      | <b>2.97</b>              |                   |       |             |
|                                    | Mean (Age)        | <b>1.04 <sup>b</sup></b>  | <b>2.00 <sup>b</sup></b> | <b>2.84 <sup>b</sup></b> | <b>8.53 <sup>a</sup></b>  |                          |                   | 0.001 |             |
| <i>Clostridium sensu stricto 1</i> | C                 | 0.44                      | 0.31                     | 6.11                     | 0.29                      | <b>1.79</b>              | 0.960             |       | 1.000       |
|                                    | Br                | 0.14                      | 0.08                     | 5.30                     | 0.35                      | <b>1.47</b>              |                   |       |             |
|                                    | Sy                | 0.34                      | 0.30                     | 5.50                     | 0.10                      | <b>1.56</b>              |                   |       |             |
|                                    | Mean (Age)        | <b>0.30 <sup>b</sup></b>  | <b>0.23 <sup>b</sup></b> | <b>5.64 <sup>a</sup></b> | <b>0.25 <sup>b</sup></b>  |                          |                   | 0.001 |             |
| <i>Corynebacterium 1</i>           | C                 | 0.09                      | 0.25                     | 8.08                     | 4.49                      | <b>3.23</b>              | 0.800             |       | 0.770       |
|                                    | Br                | 0.05                      | 0.11                     | 5.63                     | 3.22                      | <b>2.25</b>              |                   |       |             |
|                                    | Sy                | 0.56                      | 0.07                     | 3.49                     | 2.01                      | <b>1.53</b>              |                   |       |             |
|                                    | Mean (Age)        | <b>0.23 <sup>b</sup></b>  | <b>0.14 <sup>b</sup></b> | <b>5.73 <sup>a</sup></b> | <b>3.24 <sup>ab</sup></b> |                          |                   | 0.001 |             |
| <i>Candidatus-Arthromitus</i>      | C                 | 0.09                      | 11.12                    | 0.13                     | 0.97                      | <b>3.08</b>              | 0.800             |       | 0.240       |
|                                    | Br                | 0.47                      | 0.58                     | 0.58                     | 0.09                      | <b>0.43</b>              |                   |       |             |
|                                    | Sy                | 0.11                      | 0.99                     | 0.14                     | 0.01                      | <b>0.31</b>              |                   |       |             |
|                                    | Mean (Age)        | <b>0.22</b>               | <b>4.23</b>              | <b>0.28</b>              | <b>0.36</b>               |                          |                   | 0.230 |             |
| <i>Staphylococcus</i>              | C                 | 0.07                      | 0.54                     | 7.31                     | 1.25                      | <b>2.29</b>              | 0.940             |       | 0.860       |
|                                    | Br                | 0.04                      | 0.71                     | 5.24                     | 1.60                      | <b>1.90</b>              |                   |       |             |
|                                    | Sy                | 0.20                      | 0.19                     | 7.75                     | 0.70                      | <b>2.21</b>              |                   |       |             |
|                                    | Mean (Age)        | <b>0.11 <sup>b</sup></b>  | <b>0.48 <sup>b</sup></b> | <b>6.76 <sup>a</sup></b> | <b>1.18 <sup>b</sup></b>  |                          |                   | 0.001 |             |
| <i>Butyricicoccus</i>              | C                 | 0.04                      | 0.96                     | 0.10                     | 0.00                      | <b>0.28</b>              | 0.820             |       | 0.820       |
|                                    | Br                | 0.27                      | 1.56                     | 0.07                     | 0.00                      | <b>0.48</b>              |                   |       |             |
|                                    | Sy                | 0.16                      | 0.49                     | 0.01                     | 0.00                      | <b>0.17</b>              |                   |       |             |
|                                    | Mean (Age)        | <b>0.16 <sup>b</sup></b>  | <b>1.00 <sup>a</sup></b> | <b>0.06 <sup>b</sup></b> | <b>0.00 <sup>b</sup></b>  |                          |                   | 0.018 |             |
| <i>Weissella</i>                   | C                 | 0.02                      | 0.20                     | 3.03                     | 0.57                      | <b>0.95</b>              | 0.800             |       | 0.420       |
|                                    | Br                | 0.05                      | 0.29                     | 1.74                     | 0.23                      | <b>0.58</b>              |                   |       |             |
|                                    | Sy                | 0.40                      | 0.28                     | 0.63                     | 0.11                      | <b>0.36</b>              |                   |       |             |
|                                    | Mean (Age)        | <b>0.16 <sup>b</sup></b>  | <b>0.26 <sup>b</sup></b> | <b>1.80 <sup>a</sup></b> | <b>0.30 <sup>b</sup></b>  |                          |                   | 0.014 |             |
| <i>Romboutsia</i>                  | C                 | 0.02                      | 3.30                     | 1.85                     | 3.06                      | <b>2.06</b>              | 0.950             |       | 0.640       |
|                                    | Br                | 0.01                      | 2.18                     | 0.24                     | 7.76                      | <b>2.55</b>              |                   |       |             |
|                                    | Sy                | 0.11                      | 0.86                     | 0.78                     | 6.41                      | <b>2.04</b>              |                   |       |             |
|                                    | Mean (Age)        | <b>0.05 <sup>b</sup></b>  | <b>2.11 <sup>b</sup></b> | <b>0.96 <sup>b</sup></b> | <b>5.74 <sup>a</sup></b>  |                          |                   | 0.010 |             |
| <i>Turicibacter</i>                | C                 | 0.00                      | 0.90                     | 0.54                     | 2.01                      | <b>0.86</b>              | 0.820             |       | 0.360       |
|                                    | Br                | 0.00                      | 0.01                     | 0.15                     | 6.38                      | <b>1.64</b>              |                   |       |             |
|                                    | Sy                | 0.00                      | 0.02                     | 0.12                     | 3.37                      | <b>0.88</b>              |                   |       |             |
|                                    | Mean (Age)        | <b>0.00 <sup>b</sup></b>  | <b>0.31 <sup>b</sup></b> | <b>0.27 <sup>b</sup></b> | <b>3.92 <sup>a</sup></b>  |                          |                   | 0.001 |             |
| <i>Lactococcus</i>                 | C                 | 0.00                      | 3.17                     | 3.54                     | 0.55                      | <b>1.82</b>              | 0.990             |       | 0.160       |
|                                    | Br                | 0.00                      | 0.59                     | 6.03                     | 0.93                      | <b>1.89</b>              |                   |       |             |

|                                   |                   |                          |                         |                          |                         |              |       |       |       |
|-----------------------------------|-------------------|--------------------------|-------------------------|--------------------------|-------------------------|--------------|-------|-------|-------|
|                                   | Sy                | 0.00                     | 3.66                    | 3.26                     | 0.45                    | <b>1.84</b>  |       |       |       |
|                                   | <b>Mean (Age)</b> | <b>0.00<sup>b</sup></b>  | <b>2.48<sup>a</sup></b> | <b>4.28<sup>a</sup></b>  | <b>0.64<sup>b</sup></b> |              |       | 0.001 |       |
| <i>Leuconostoc</i>                | C                 | 0.00                     | 0.01                    | 1.50                     | 0.16                    | <b>0.42</b>  | 0.920 |       | 0.200 |
|                                   | Br                | 0.00                     | 0.00                    | 0.89                     | 0.52                    | <b>0.35</b>  |       |       |       |
|                                   | Sy                | 0.00                     | 0.00                    | 1.06                     | 0.37                    | <b>0.36</b>  |       |       |       |
|                                   | <b>Mean (Age)</b> | <b>0.00<sup>b</sup></b>  | <b>0.00<sup>b</sup></b> | <b>1.15<sup>a</sup></b>  | <b>0.35<sup>b</sup></b> | <b>66.27</b> |       | 0.001 |       |
| <i>Bacillus</i>                   | C                 | 0.01 <sup>B</sup>        | 0.03                    | 0.02                     | 0.002 <sup>B</sup>      | <b>0.01</b>  | 0.019 |       | 0.360 |
|                                   | Br                | 0.01 <sup>B</sup>        | 0.05                    | 0.01                     | 0.002 <sup>B</sup>      | <b>0.02</b>  |       |       |       |
|                                   | Sy                | 0.12 <sup>A</sup>        | 0.20                    | 0.28                     | 0.043 <sup>A</sup>      | <b>0.16</b>  |       |       |       |
|                                   | <b>Mean (Age)</b> | <b>4.67</b>              | <b>9.33</b>             | <b>10.33</b>             | <b>1.57</b>             |              |       | 0.250 |       |
| <i>Ruminococcaceae</i><br>UCG-014 | C                 | 0.23                     | 1.12                    | 0.25                     | 0.01                    | <b>0.48</b>  | 0.780 |       | 0.860 |
|                                   | Br                | 0.09                     | 1.04                    | 0.80                     | 0.01                    | <b>0.40</b>  |       |       |       |
|                                   | Sy                | 1.08                     | 1.45                    | 0.57                     | 0.02                    | <b>0.78</b>  |       |       |       |
|                                   | <b>Mean (Age)</b> | <b>0.46<sup>ab</sup></b> | <b>1.20<sup>a</sup></b> | <b>0.54<sup>ab</sup></b> | <b>0.01<sup>b</sup></b> |              |       | 0.047 |       |

Averages of the columns with different capital letter superscripts and values within the mean rows with different lowercase letters are significantly different ( $p < 0.05$ ).

**Table S9.** Relative abundance of Ileum mucosa microbiota at genus level.

| Genus                          | Ileum Mucosa (%)  |                          |                          |                          |                          |                          | FDR p-Value       |       |             |
|--------------------------------|-------------------|--------------------------|--------------------------|--------------------------|--------------------------|--------------------------|-------------------|-------|-------------|
|                                | Dietary Treatment | Age of Birds             |                          |                          |                          | Mean (Dietary Treatment) | Dietary Treatment | Age   | Interaction |
|                                |                   | d 7                      | d 14                     | d 21                     | d 40                     |                          |                   |       |             |
| <i>Candidatus Arthromitus</i>  | C                 | 83.76                    | 82.20                    | 70.15                    | 3.51                     | <b>59.90</b>             | 0.660             |       | 0.021       |
|                                | Br                | 72.26                    | 78.03                    | 51.15                    | 3.93                     | <b>51.34</b>             |                   |       |             |
|                                | Sy                | 42.19                    | 72.73                    | 84.89                    | 11.62                    | <b>52.86</b>             |                   |       |             |
|                                | <b>Mean (Age)</b> | <b>66.07<sup>a</sup></b> | <b>77.65<sup>a</sup></b> | <b>68.73<sup>a</sup></b> | <b>6.35<sup>b</sup></b>  |                          |                   | 0.001 |             |
| <i>Lactobacillus</i>           | C                 | 6.48                     | 3.94                     | 11.91 <sup>AB</sup>      | 41.35                    | <b>15.92</b>             | 0.660             |       | 0.025       |
|                                | Br                | 6.00                     | 5.93                     | 22.64 <sup>A</sup>       | 64.41                    | <b>24.74</b>             |                   |       |             |
|                                | Sy                | 16.25                    | 9.96                     | 3.90 <sup>B</sup>        | 47.03                    | <b>19.28</b>             |                   |       |             |
|                                | <b>Mean (Age)</b> | <b>9.58<sup>b</sup></b>  | <b>6.61<sup>b</sup></b>  | <b>12.82<sup>b</sup></b> | <b>50.93<sup>a</sup></b> |                          |                   | 0.001 |             |
| <i>Enterococcus</i>            | C                 | 6.47                     | 0.05                     | 0.45                     | 3.37                     | <b>2.58</b>              | 0.770             |       | 0.950       |
|                                | Br                | 3.86                     | 0.06                     | 1.51                     | 1.13                     | <b>1.64</b>              |                   |       |             |
|                                | Sy                | 11.95                    | 0.79                     | 0.25                     | 3.61                     | <b>4.15</b>              |                   |       |             |
|                                | <b>Mean (Age)</b> | <b>7.42</b>              | <b>0.30</b>              | <b>0.74</b>              | <b>2.70</b>              |                          |                   | 0.320 |             |
| <i>Delftia</i>                 | C                 | 0.35                     | 0.01                     | 0.15                     | 0.01                     | <b>0.13</b>              | 0.660             |       | 0.110       |
|                                | Br                | 1.08                     | 0.00                     | 0.06                     | 0.00                     | <b>0.29</b>              |                   |       |             |
|                                | Sy                | 2.46                     | 0.00                     | 0.07                     | 0.00                     | <b>0.63</b>              |                   |       |             |
|                                | <b>Mean (Age)</b> | <b>1.30<sup>a</sup></b>  | <b>0.00<sup>b</sup></b>  | <b>0.10<sup>b</sup></b>  | <b>0.00<sup>b</sup></b>  |                          |                   | 0.001 |             |
| <i>Romboutsia</i>              | C                 | 0.05                     | 1.32                     | 0.80                     | 10.33                    | <b>0.04</b>              | 0.990             |       | 1.000       |
|                                | Br                | 0.13                     | 1.84                     | 0.91                     | 9.71                     | <b>0.11</b>              |                   |       |             |
|                                | Sy                | 1.27                     | 0.81                     | 0.47                     | 10.84                    | <b>0.25</b>              |                   |       |             |
|                                | <b>Mean (Age)</b> | <b>0.48<sup>b</sup></b>  | <b>1.32<sup>b</sup></b>  | <b>0.73<sup>b</sup></b>  | <b>10.29<sup>a</sup></b> |                          |                   | 0.001 |             |
| <i>Pseudomonas</i>             | C                 | 0.06                     | 1.98                     | 3.46                     | 0.16                     | <b>3.12</b>              | 0.980             |       | 0.170       |
|                                | Br                | 0.25                     | 3.32                     | 1.60                     | 0.10                     | <b>3.15</b>              |                   |       |             |
|                                | Sy                | 0.69                     | 3.11                     | 1.32                     | 0.09                     | <b>3.35</b>              |                   |       |             |
|                                | <b>Mean (Age)</b> | <b>0.33<sup>b</sup></b>  | <b>2.80<sup>a</sup></b>  | <b>2.12<sup>a</sup></b>  | <b>0.12<sup>b</sup></b>  |                          |                   | 0.001 |             |
| <i>Streptococcus</i>           | C                 | 0.17                     | 0.19                     | 0.78                     | 14.30                    | <b>1.41</b>              | 0.660             |       | 0.074       |
|                                | Br                | 0.20                     | 0.24                     | 1.20                     | 6.55                     | <b>1.32</b>              |                   |       |             |
|                                | Sy                | 0.19                     | 0.59                     | 0.44                     | 5.26                     | <b>1.30</b>              |                   |       |             |
|                                | <b>Mean (Age)</b> | <b>0.19<sup>b</sup></b>  | <b>0.34<sup>b</sup></b>  | <b>0.81<sup>b</sup></b>  | <b>8.70<sup>a</sup></b>  |                          |                   | 0.001 |             |
| <i>Turicibacter</i>            | C                 | 0.01                     | 0.00                     | 0.81                     | 10.88                    | <b>3.86</b>              | 0.700             |       | 0.800       |
|                                | Br                | 0.00                     | 0.00                     | 0.05                     | 5.97                     | <b>2.05</b>              |                   |       |             |
|                                | Sy                | 0.01                     | 0.12                     | 0.17                     | 9.30                     | <b>1.62</b>              |                   |       |             |
|                                | <b>Mean (Age)</b> | <b>0.01<sup>b</sup></b>  | <b>0.04<sup>b</sup></b>  | <b>0.35<sup>b</sup></b>  | <b>8.72<sup>a</sup></b>  |                          |                   | 0.001 |             |
| <i>Lysinibacillus</i>          | C                 | 0.001                    | 0.001                    | 0.441                    | 0.003                    | <b>0.011</b>             | 0.600             |       | 0.002       |
|                                | Br                | 0.001                    | 0.001                    | 0.139                    | 0.001                    | <b>0.035</b>             |                   |       |             |
|                                | Sy                | 0.005                    | 0.001                    | 0.137                    | 0.001                    | <b>0.036</b>             |                   |       |             |
|                                | <b>Mean (Age)</b> | <b>0.002<sup>b</sup></b> | <b>0.001<sup>b</sup></b> | <b>0.239<sup>a</sup></b> | <b>0.001<sup>a</sup></b> |                          |                   | 0.001 |             |
| <i>Ruminococcaceae UCG-008</i> | C                 | 0.001                    | 0.001                    | 0.001                    | 0.024 <sup>B</sup>       | <b>0.006</b>             | 0.001             |       | 0.001       |
|                                | Br                | 0.001                    | 0.001                    | 0.002                    | 0.089 <sup>A</sup>       | <b>0.023</b>             |                   |       |             |
|                                | Sy                | 0.001                    | 0.001                    | 0.001                    | 0.009 <sup>B</sup>       | <b>0.002</b>             |                   |       |             |
|                                | <b>Mean (Age)</b> | <b>0.001<sup>b</sup></b> | <b>0.001<sup>b</sup></b> | <b>0.001<sup>b</sup></b> | <b>0.041<sup>a</sup></b> |                          |                   | 0.001 |             |
| <i>Bacillus</i>                | C                 | 0.061                    | 0.154                    | 0.166                    | 0.008                    | <b>0.097</b>             | 0.660             |       | 0.220       |
|                                | Br                | 0.085                    | 0.064                    | 0.136                    | 0.042                    | <b>0.082</b>             |                   |       |             |
|                                | Sy                | 0.243                    | 0.210                    | 0.094                    | 0.012                    | <b>0.140</b>             |                   |       |             |
|                                | <b>Mean (Age)</b> | <b>0.130</b>             | <b>0.143</b>             | <b>0.132</b>             | <b>0.021</b>             |                          |                   | 0.110 |             |

Averages of the columns with different capital letter superscripts and values within the mean rows with different lowercase letters are significantly different ( $p < 0.05$ ).

**Table S10.** Relative abundance of caecum chymus microbiota at genus level.

| Genus                                       | Caecum Chymus (%) |                          |                          |                          |                          |                          | FDR <i>p</i> -Value |       |             |
|---------------------------------------------|-------------------|--------------------------|--------------------------|--------------------------|--------------------------|--------------------------|---------------------|-------|-------------|
|                                             | Dietary Treatment | Age of Birds             |                          |                          |                          | Mean (Dietary Treatment) | Dietary Treatment   | Age   | Interaction |
|                                             |                   | d 7                      | d 14                     | d 21                     | d 40                     |                          |                     |       |             |
| <i>Escherichia-Shigella</i>                 | C                 | 5.46                     | 1.52                     | 0.49                     | 0.16                     | <b>1.91</b>              | 0.910               |       | 0.770       |
|                                             | Br                | 8.15                     | 3.62                     | 0.37                     | 0.10                     | <b>3.06</b>              |                     |       |             |
|                                             | Sy                | 10.06                    | 1.94                     | 0.59                     | 0.18                     | <b>3.19</b>              |                     |       |             |
|                                             | Mean (Age)        | <b>7.89<sup>a</sup></b>  | <b>2.36<sup>b</sup></b>  | <b>0.48<sup>b</sup></b>  | <b>0.15<sup>b</sup></b>  |                          |                     | 0.001 |             |
| <i>Subdoligranulum</i>                      | C                 | 8.69                     | 1.68                     | 1.79                     | 1.12                     | <b>3.32</b>              | 0.890               |       | 0.430       |
|                                             | Br                | 10.32                    | 1.23                     | 0.99                     | 0.80                     | <b>3.33</b>              |                     |       |             |
|                                             | Sy                | 1.43                     | 0.88                     | 1.56                     | 1.09                     | <b>1.24</b>              |                     |       |             |
|                                             | Mean (Age)        | <b>6.81<sup>a</sup></b>  | <b>1.26<sup>b</sup></b>  | <b>1.45<sup>b</sup></b>  | <b>1.00<sup>b</sup></b>  |                          |                     | 0.015 |             |
| <i>Butyricicoccus</i>                       | C                 | 4.85                     | 2.86                     | 2.56                     | 1.31                     | <b>2.89</b>              | 0.890               |       | 0.370       |
|                                             | Br                | 5.01                     | 3.50                     | 2.25                     | 0.62                     | <b>2.84</b>              |                     |       |             |
|                                             | Sy                | 5.36                     | 7.24                     | 2.94                     | 0.95                     | <b>4.12</b>              |                     |       |             |
|                                             | Mean (Age)        | <b>5.07<sup>a</sup></b>  | <b>4.53<sup>ab</sup></b> | <b>2.58<sup>bc</sup></b> | <b>0.96<sup>c</sup></b>  |                          |                     | 0.001 |             |
| <i>Ruminococcaceae</i><br><i>UCG-014</i>    | C                 | 3.84                     | 7.01                     | 4.02                     | 5.08                     | <b>1.92</b>              | 0.910               |       | 0.440       |
|                                             | Br                | 2.79                     | 4.54                     | 4.98                     | 5.64                     | <b>1.99</b>              |                     |       |             |
|                                             | Sy                | 3.49                     | 4.68                     | 4.33                     | 5.39                     | <b>1.76</b>              |                     |       |             |
|                                             | Mean (Age)        | <b>3.37<sup>b</sup></b>  | <b>5.41<sup>a</sup></b>  | <b>4.44<sup>ab</sup></b> | <b>5.37<sup>a</sup></b>  |                          |                     | 0.022 |             |
| <i>Anaeroplasma</i>                         | C                 | 4.89                     | 1.87                     | 0.08                     | 0.06                     | <b>4.99</b>              | 0.910               |       | 0.430       |
|                                             | Br                | 1.31                     | 2.37                     | 0.31                     | 0.08                     | <b>4.49</b>              |                     |       |             |
|                                             | Sy                | 2.88                     | 1.76                     | 0.08                     | 0.04                     | <b>4.47</b>              |                     |       |             |
|                                             | Mean (Age)        | <b>3.03<sup>a</sup></b>  | <b>2.00<sup>ab</sup></b> | <b>0.16<sup>b</sup></b>  | <b>0.06<sup>b</sup></b>  |                          |                     | 0.001 |             |
| <i>Ruminococcus torques</i><br><i>group</i> | C                 | 2.23                     | 7.99                     | 1.35                     | 1.90                     | <b>1.72</b>              | 0.910               |       | 0.390       |
|                                             | Br                | 3.14                     | 3.19                     | 1.79                     | 1.73                     | <b>1.02</b>              |                     |       |             |
|                                             | Sy                | 2.90                     | 5.00                     | 1.88                     | 1.44                     | <b>1.19</b>              |                     |       |             |
|                                             | Mean (Age)        | <b>2.75<sup>ab</sup></b> | <b>5.40<sup>b</sup></b>  | <b>1.67<sup>b</sup></b>  | <b>1.69<sup>a</sup></b>  |                          |                     | 0.004 |             |
| <i>Lachnoclostridium</i>                    | C                 | 2.08                     | 1.66                     | 0.82                     | 0.36                     | <b>3.37</b>              | 1.000               |       | 1.000       |
|                                             | Br                | 2.50                     | 1.68                     | 0.53                     | 0.31                     | <b>2.46</b>              |                     |       |             |
|                                             | Sy                | 2.16                     | 1.59                     | 0.88                     | 0.29                     | <b>2.80</b>              |                     |       |             |
|                                             | Mean (Age)        | <b>2.25<sup>a</sup></b>  | <b>1.64<sup>ab</sup></b> | <b>0.74<sup>bc</sup></b> | <b>0.32<sup>c</sup></b>  |                          |                     | 0.001 |             |
| <i>Faecalibacterium</i>                     | C                 | 0.72                     | 4.51                     | 11.41                    | 5.93                     | <b>1.23</b>              | 0.910               |       | 0.950       |
|                                             | Br                | 1.53                     | 6.37                     | 13.58                    | 6.79                     | <b>1.26</b>              |                     |       |             |
|                                             | Sy                | 3.29                     | 4.64                     | 12.47                    | 5.93                     | <b>1.23</b>              |                     |       |             |
|                                             | Mean (Age)        | <b>1.85<sup>bc</sup></b> | <b>5.17<sup>b</sup></b>  | <b>12.49<sup>a</sup></b> | <b>6.22<sup>bc</sup></b> |                          |                     | 0.001 |             |
| <i>Ruminiclostridium 5</i>                  | C                 | 1.92                     | 1.76                     | 0.93                     | 0.77                     | <b>5.64</b>              | 0.930               |       | 0.550       |
|                                             | Br                | 1.16                     | 1.93                     | 0.91                     | 0.91                     | <b>7.07</b>              |                     |       |             |
|                                             | Sy                | 1.80                     | 1.70                     | 0.80                     | 0.67                     | <b>6.58</b>              |                     |       |             |
|                                             | Mean (Age)        | <b>1.63<sup>a</sup></b>  | <b>1.80<sup>a</sup></b>  | <b>0.88<sup>b</sup></b>  | <b>0.78<sup>b</sup></b>  |                          |                     | 0.001 |             |
| <i>Anaerotruncus</i>                        | C                 | 2.12                     | 0.46                     | 0.24                     | 0.08                     | <b>1.35</b>              | 0.910               |       | 0.250       |
|                                             | Br                | 1.00                     | 0.70                     | 0.11                     | 0.10                     | <b>1.23</b>              |                     |       |             |
|                                             | Sy                | 1.76                     | 0.64                     | 0.17                     | 0.09                     | <b>1.24</b>              |                     |       |             |
|                                             | Mean (Age)        | <b>1.63<sup>a</sup></b>  | <b>0.60<sup>b</sup></b>  | <b>0.18<sup>b</sup></b>  | <b>0.09<sup>b</sup></b>  |                          |                     | 0.001 |             |
| <i>Negativibacillus</i>                     | C                 | 1.58                     | 1.69                     | 0.78                     | 0.69                     | <b>0.72</b>              | 0.910               |       | 0.120       |
|                                             | Br                | 1.17                     | 2.79                     | 0.59                     | 0.52                     | <b>0.48</b>              |                     |       |             |
|                                             | Sy                | 2.03                     | 2.11                     | 0.76                     | 0.54                     | <b>0.66</b>              |                     |       |             |
|                                             | Mean (Age)        | <b>1.60<sup>a</sup></b>  | <b>2.20<sup>a</sup></b>  | <b>0.71<sup>b</sup></b>  | <b>0.58<sup>b</sup></b>  |                          |                     | 0.001 |             |
| <i>Lactobacillus</i>                        | C                 | 1.67                     | 3.03                     | 10.95                    | 15.45                    | <b>1.18</b>              | 0.930               |       | 0.020       |
|                                             | Br                | 0.31                     | 0.91                     | 10.87                    | 21.61                    | <b>1.27</b>              |                     |       |             |
|                                             | Sy                | 1.74                     | 1.73                     | 8.02                     | 20.85                    | <b>1.36</b>              |                     |       |             |
|                                             | Mean (Age)        | <b>1.24<sup>b</sup></b>  | <b>1.89<sup>b</sup></b>  | <b>9.95<sup>c</sup></b>  | <b>19.30<sup>a</sup></b> |                          |                     | 0.001 |             |
| <i>Bacillus</i>                             | C                 | 1.53                     | 0.89                     | 2.07                     | 0.95                     | <b>7.78</b>              | 0.890               |       | 0.980       |
|                                             | Br                | 0.87                     | 0.72                     | 1.28                     | 0.63                     | <b>8.43</b>              |                     |       |             |
|                                             | Sy                | 0.82                     | 0.64                     | 1.27                     | 0.85                     | <b>8.09</b>              |                     |       |             |
|                                             | Mean (Age)        | <b>1.07</b>              | <b>0.75</b>              | <b>1.54</b>              | <b>0.81</b>              |                          |                     | 0.190 |             |
| <i>Oscillibacter</i>                        | C                 | 0.73                     | 1.66                     | 0.27                     | 0.28                     | <b>1.36</b>              | 0.890               |       | 0.089       |
|                                             | Br                | 0.68                     | 1.01                     | 0.29                     | 0.24                     | <b>0.88</b>              |                     |       |             |

|                                                |                   |                          |                          |                          |                          |             |       |       |       |
|------------------------------------------------|-------------------|--------------------------|--------------------------|--------------------------|--------------------------|-------------|-------|-------|-------|
|                                                | Sy                | 1.78                     | 1.01                     | 0.39                     | 0.27                     | <b>0.89</b> |       |       |       |
|                                                | <b>Mean (Age)</b> | <b>1.06<sup>a</sup></b>  | <b>1.23<sup>a</sup></b>  | <b>0.31<sup>b</sup></b>  | <b>0.26<sup>b</sup></b>  |             |       | 0.001 |       |
| <i>Ruminococcaceae</i><br><i>UCG-005</i>       | C                 | 1.42                     | 0.75                     | 3.25                     | 3.00                     | <b>0.73</b> | 0.990 |       | 0.220 |
|                                                | Br                | 0.42                     | 2.65                     | 2.27                     | 3.33                     | <b>0.55</b> |       |       |       |
|                                                | Sy                | 0.74                     | 1.65                     | 1.65                     | 3.93                     | <b>0.86</b> |       |       |       |
|                                                | <b>Mean (Age)</b> | <b>0.86<sup>c</sup></b>  | <b>1.68<sup>bc</sup></b> | <b>2.39<sup>ab</sup></b> | <b>3.42<sup>a</sup></b>  |             |       | 0.001 |       |
| <i>GCA 900066575</i>                           | C                 | 1.20                     | 1.74                     | 0.53                     | 0.34                     | <b>2.11</b> | 0.910 |       | 0.210 |
|                                                | Br                | 0.55                     | 2.24                     | 0.49                     | 0.24                     | <b>2.17</b> |       |       |       |
|                                                | Sy                | 0.76                     | 0.76                     | 0.72                     | 0.26                     | <b>1.99</b> |       |       |       |
|                                                | <b>Mean (Age)</b> | <b>0.84<sup>ab</sup></b> | <b>1.58<sup>a</sup></b>  | <b>0.58<sup>b</sup></b>  | <b>0.28<sup>b</sup></b>  |             |       | 0.001 |       |
| <i>Erysipelatoclostridium</i>                  | C                 | 0.94                     | 0.38                     | 1.63                     | 1.79                     | <b>0.95</b> | 0.450 |       | 0.100 |
|                                                | Br                | 0.22                     | 0.27                     | 1.36                     | 0.81                     | <b>0.88</b> |       |       |       |
|                                                | Sy                | 0.93                     | 0.29                     | 1.66                     | 0.84                     | <b>0.62</b> |       |       |       |
|                                                | <b>Mean (Age)</b> | <b>0.70<sup>c</sup></b>  | <b>0.31<sup>bc</sup></b> | <b>1.55<sup>a</sup></b>  | <b>1.15<sup>ac</sup></b> |             |       | 0.001 |       |
| <i>DTU089</i>                                  | C                 | 1.01                     | 1.47                     | 0.46                     | 0.24                     | <b>1.19</b> | 0.990 |       | 0.890 |
|                                                | Br                | 0.31                     | 2.16                     | 0.64                     | 0.27                     | <b>0.67</b> |       |       |       |
|                                                | Sy                | 0.40                     | 1.76                     | 0.34                     | 0.27                     | <b>0.93</b> |       |       |       |
|                                                | <b>Mean (Age)</b> | <b>0.57<sup>b</sup></b>  | <b>1.80<sup>a</sup></b>  | <b>0.48<sup>b</sup></b>  | <b>0.26<sup>bc</sup></b> |             |       | 0.002 |       |
| <i>Blautia</i>                                 | C                 | 0.41                     | 0.21                     | 1.37                     | 2.08                     | <b>0.79</b> | 0.920 |       | 0.920 |
|                                                | Br                | 0.16                     | 0.18                     | 1.63                     | 1.95                     | <b>0.84</b> |       |       |       |
|                                                | Sy                | 0.53                     | 0.14                     | 1.41                     | 2.40                     | <b>0.69</b> |       |       |       |
|                                                | <b>Mean (Age)</b> | <b>0.37<sup>b</sup></b>  | <b>0.18<sup>b</sup></b>  | <b>1.47<sup>c</sup></b>  | <b>2.14<sup>a</sup></b>  |             |       | 0.001 |       |
| <i>CHKCI001</i>                                | C                 | 0.25                     | 0.19                     | 3.25                     | 2.69                     | <b>1.02</b> | 0.910 |       | 0.870 |
|                                                | Br                | 0.09                     | 0.15                     | 3.98                     | 4.46                     | <b>0.98</b> |       |       |       |
|                                                | Sy                | 0.04                     | 0.06                     | 3.62                     | 2.52                     | <b>1.12</b> |       |       |       |
|                                                | <b>Mean (Age)</b> | <b>0.13<sup>b</sup></b>  | <b>0.13<sup>b</sup></b>  | <b>3.62<sup>a</sup></b>  | <b>3.23<sup>a</sup></b>  |             |       | 0.001 |       |
| <i>Christensenellaceae R</i><br><i>7 group</i> | C                 | 0.20                     | 0.15                     | 1.25                     | 1.69                     | <b>1.60</b> | 1.000 |       | 0.890 |
|                                                | Br                | 0.07                     | 0.33                     | 1.06                     | 1.87                     | <b>2.17</b> |       |       |       |
|                                                | Sy                | 0.06                     | 0.43                     | 1.12                     | 1.77                     | <b>1.56</b> |       |       |       |
|                                                | <b>Mean (Age)</b> | <b>0.11<sup>b</sup></b>  | <b>0.30<sup>b</sup></b>  | <b>1.14<sup>c</sup></b>  | <b>1.77<sup>a</sup></b>  |             |       | 0.001 |       |
| <i>Romboutsia</i>                              | C                 | 0.06                     | 0.03                     | 1.65                     | 4.61                     | <b>0.82</b> | 0.890 |       | 0.091 |
|                                                | Br                | 0.02                     | 0.04                     | 1.18                     | 3.80                     | <b>0.83</b> |       |       |       |
|                                                | Sy                | 0.05                     | 0.06                     | 0.77                     | 5.15                     | <b>0.84</b> |       |       |       |
|                                                | <b>Mean (Age)</b> | <b>0.04<sup>b</sup></b>  | <b>0.04<sup>b</sup></b>  | <b>1.20<sup>c</sup></b>  | <b>4.52<sup>a</sup></b>  |             |       | 0.001 |       |
| <i>Alistipes</i>                               | C                 | 0.01                     | 8.90                     | 10.41                    | 5.37                     | <b>1.59</b> | 0.990 |       | 0.830 |
|                                                | Br                | 0.06                     | 7.10                     | 8.52                     | 7.33                     | <b>1.26</b> |       |       |       |
|                                                | Sy                | 0.00                     | 8.62                     | 8.15                     | 6.61                     | <b>1.51</b> |       |       |       |
|                                                | <b>Mean (Age)</b> | <b>0.02<sup>b</sup></b>  | <b>8.21<sup>b</sup></b>  | <b>9.02<sup>c</sup></b>  | <b>6.44<sup>a</sup></b>  |             |       | 0.001 |       |
| <i>Turicibacter</i>                            | C                 | 0.00                     | 0.00                     | 0.22                     | 2.89                     | <b>6.17</b> | 0.890 |       | 0.180 |
|                                                | Br                | 0.00                     | 0.00                     | 0.12                     | 2.26                     | <b>5.75</b> |       |       |       |
|                                                | Sy                | 0.00                     | 0.01                     | 0.34                     | 3.28                     | <b>5.84</b> |       |       |       |
|                                                | <b>Mean (Age)</b> | <b>0.00<sup>b</sup></b>  | <b>0.00<sup>b</sup></b>  | <b>0.23<sup>b</sup></b>  | <b>2.81<sup>a</sup></b>  |             |       | 0.001 |       |
| <i>Akkermansia</i>                             | C                 | 0.00                     | 0.00                     | 2.59                     | 0.49                     | <b>0.78</b> | 0.990 |       | 1.000 |
|                                                | Br                | 0.00                     | 0.01                     | 2.78                     | 0.77                     | <b>0.60</b> |       |       |       |
|                                                | Sy                | 0.00                     | 0.04                     | 2.89                     | 0.82                     | <b>0.91</b> |       |       |       |
|                                                | <b>Mean (Age)</b> | <b>0.00<sup>b</sup></b>  | <b>0.01<sup>b</sup></b>  | <b>2.75<sup>a</sup></b>  | <b>0.69<sup>b</sup></b>  |             |       | 0.001 |       |
| <i>Bacteroides</i>                             | C                 | 0.00                     | 0.71                     | 2.61                     | 6.44                     | <b>0.77</b> | 0.940 |       | 0.230 |
|                                                | Br                | 0.00                     | 0.00                     | 6.77                     | 3.93                     | <b>0.89</b> |       |       |       |
|                                                | Sy                | 0.00                     | 0.00                     | 9.45                     | 3.31                     | <b>0.94</b> |       |       |       |
|                                                | <b>Mean (Age)</b> | <b>0.00<sup>b</sup></b>  | <b>0.24<sup>b</sup></b>  | <b>6.28<sup>a</sup></b>  | <b>4.56<sup>a</sup></b>  |             |       | 0.001 |       |
| <i>Ruminococcaceae</i><br><i>UCG-008</i>       | C                 | 0.00                     | 0.00                     | 0.00                     | 2.08                     | <b>2.44</b> | 0.910 |       | 0.900 |
|                                                | Br                | 0.00                     | 0.02                     | 0.00                     | 2.38                     | <b>2.68</b> |       |       |       |
|                                                | Sy                | 0.00                     | 0.00                     | 0.00                     | 1.78                     | <b>3.19</b> |       |       |       |
|                                                | <b>Mean (Age)</b> | <b>0.00<sup>b</sup></b>  | <b>0.01<sup>b</sup></b>  | <b>0.00<sup>b</sup></b>  | <b>2.08<sup>a</sup></b>  |             |       | 0.001 |       |
| <i>Candidatus</i><br><i>Arthromitus</i>        | C                 | 0.45                     | 0.07                     | 0.02 <sup>A</sup>        | 0.00                     | <b>0.14</b> | 0.910 |       | 0.950 |
|                                                | Br                | 0.18                     | 0.08                     | 0.01 <sup>AB</sup>       | 0.00                     | <b>0.07</b> |       |       |       |
|                                                | Sy                | 0.23                     | 0.05                     | 0.00 <sup>B</sup>        | 0.00                     | <b>0.07</b> |       |       |       |
|                                                | <b>Mean (Age)</b> | <b>0.29<sup>a</sup></b>  | <b>0.07<sup>ab</sup></b> | <b>0.01<sup>ab</sup></b> | <b>0.00<sup>b</sup></b>  |             |       | 0.062 |       |

Averages of the columns with different capital letter superscripts and values within the mean rows with different lowercase letters are significantly different ( $p < 0.05$ ).

**Table S11.** Spearman's correlation between gut microbiota composition and host IBD virus ELISA titers on day 7-21.

| Phylum          | Order                 | Family                | Genus                                | IC    | IM    | CC    |
|-----------------|-----------------------|-----------------------|--------------------------------------|-------|-------|-------|
| Actinobacteria  | Corynebacteriales     | Corynebacteriaceae    | <i>Corynebacterium 1</i>             | -0.61 |       |       |
|                 | Micrococcales         | Micrococcaceae        | <i>Rothia</i>                        | -0.69 |       |       |
|                 |                       |                       | <i>Kocuria</i>                       | -0.65 |       |       |
|                 | Propionibacteriales   | Propionibacteriaceae  | <i>Cutibacterium</i>                 |       | 0.69  |       |
| Bacteroidetes   | Bacteroidales         | Bacteroidaceae        | <i>Bacteroides</i>                   |       |       | -0.72 |
|                 |                       | Rikenellaceae         | <i>Alistipes</i>                     |       |       | -0.62 |
| Firmicutes      | Bacillales            | Bacillaceae           | <i>Anaerobacillus</i>                |       | 0.62  |       |
|                 |                       | Planococcaceae        | <i>Lysinibacillus</i>                |       | -0.76 |       |
|                 |                       | Staphylococcaceae     | <i>Staphylococcus</i>                | -0.68 |       | -0.72 |
|                 | Lactobacillales       | Carnobacteriaceae     | <i>Trichococcus</i>                  | -0.6  |       |       |
|                 |                       | Lactobacillaceae      | <i>Lactobacillus</i>                 |       |       | -0.66 |
|                 |                       | Leuconostocaceae      | <i>Leuconostoc</i>                   | -0.76 | -0.61 | -0.66 |
|                 |                       |                       | <i>Weissella</i>                     |       |       | -0.61 |
|                 |                       | Streptococcaceae      | <i>Lactococcus</i>                   | -0.74 |       |       |
|                 |                       |                       | <i>Streptococcus</i>                 |       |       | -0.66 |
|                 |                       |                       |                                      |       |       |       |
|                 | Clostridiales         | Christensenellaceae   | <i>Christensenellaceae R7 group</i>  |       |       | -0.77 |
|                 |                       | Defluviitaleaceae     | <i>Defluviitaleaceae UCG-011</i>     |       |       | -0.6  |
|                 |                       | Family XIII           | <i>Eubacterium brachy group</i>      |       |       | -0.78 |
|                 |                       |                       | <i>Family XIII UCG-001</i>           |       |       | -0.77 |
|                 |                       |                       | <i>Family XIII AD3011 group</i>      |       |       | -0.71 |
|                 |                       |                       | <i>Eubacterium nodatum group</i>     |       |       | -0.67 |
|                 |                       |                       |                                      |       |       |       |
|                 |                       | Lachnospiraceae       | <i>CHKI001</i>                       | -0.61 |       | -0.65 |
|                 |                       |                       | <i>Marvinbryantia</i>                |       |       | -0.66 |
|                 |                       | Peptostreptococcaceae | <i>Romboutsia</i>                    |       |       | -0.76 |
|                 |                       | Ruminococcaceae       | <i>Ruminococcaceae UCG-004</i>       |       |       | -0.78 |
|                 |                       |                       | <i>Ruminococcaceae UCG-010</i>       |       |       | -0.77 |
|                 |                       |                       | <i>Ruminococcus 1</i>                |       |       | -0.74 |
|                 |                       |                       | <i>Ruminococcaceae NK4A214 group</i> |       |       | -0.67 |
|                 |                       |                       | <i>Ruminiclostridium 1</i>           |       |       | -0.65 |
|                 |                       |                       | <i>Faecalibacterium</i>              |       |       | -0.64 |
|                 |                       |                       | <i>Anaerotruncus</i>                 |       |       | 0.64  |
|                 |                       |                       | <i>Papillibacter</i>                 |       |       | -0.61 |
|                 |                       |                       |                                      |       |       |       |
|                 | Erysipelotrichales    | Erysipelotrichaceae   | <i>Turicibacter</i>                  | -0.73 |       | -0.71 |
| Proteobacteria  | Sphingomonadales      | Sphingomonadaceae     | <i>Sphingomonas</i>                  | 0.62  |       |       |
|                 | Betaproteobacteriales | Burkholderiaceae      | <i>Aquabacterium</i>                 | 0.6   |       |       |
|                 | Enterobacteriales     | Enterobacteriaceae    | <i>Escherichia-Shigella</i>          |       |       | 0.67  |
|                 | Pseudomonadales       | Moraxellaceae         | <i>Acinetobacter</i>                 | 0.76  |       |       |
| Verrucomicrobia | Verrucomicrobiales    | Akkermansiaceae       | <i>Akkermansia</i>                   | -0.65 |       | -0.72 |

Table shows only strong  $R > 0.6$  correlation coefficients based on Spearman's rank correlation (Spearman's rho).

**Table S12.** Spearman's correlation between gut microbiota composition and host Gumboro titer/ parameters on day 21-40.

| Phylum          | Order                 | Family                | Genus                                | IC    | IM    | CC    |
|-----------------|-----------------------|-----------------------|--------------------------------------|-------|-------|-------|
| Actinobacteria  | Bifidobacteriales     | Bifidobacteriaceae    | <i>Bifidobacterium</i>               | 0.79  | 0.85  | 0.62  |
|                 |                       |                       | <i>Neoscardovia</i>                  |       | 0.68  |       |
|                 | Micrococcales         | Micrococcaceae        | <i>Rothia</i>                        | -0.65 | 0.6   |       |
|                 | Coriobacteriales      | Eggerthellaceae       | <i>CHKC1002</i>                      |       |       | -0.75 |
| Firmicutes      | Bacillales            | Planococcaceae        | <i>Lysinibacillus</i>                |       | -0.8  |       |
|                 |                       | Staphylococcaceae     | <i>Staphylococcus</i>                | -0.61 |       |       |
|                 | Lactobacillales       | Aerococcaceae         | <i>Globicatella</i>                  | 0.6   |       |       |
|                 |                       | Carnobacteriaceae     | <i>Carnobacterium</i>                |       | -0.6  |       |
|                 |                       | Lactobacillaceae      | <i>Lactobacillus</i>                 |       | 0.75  | 0.71  |
|                 |                       | Leuconostocaceae      | <i>Leuconostoc</i>                   | -0.64 |       |       |
|                 |                       | Streptococcaceae      | <i>Lactococcus</i>                   | -0.68 |       |       |
|                 | Clostridiales         | Clostridiaceae 1      | <i>Candidatus Arthromitus</i>        |       | -0.74 | -0.67 |
|                 |                       |                       | <i>Clostridium sensu stricto 1</i>   | -0.83 |       | 0.73  |
|                 |                       |                       | <i>Clostridium sensu stricto 10</i>  | -0.66 |       |       |
|                 |                       |                       | <i>Clostridium sensu stricto 12</i>  | -0.76 |       |       |
|                 |                       | Family XI             | <i>Gallicola</i>                     | 0.68  | 0.72  |       |
|                 |                       | Lachnospiraceae       | <i>CHKC1001</i>                      | -0.64 |       |       |
|                 |                       |                       | <i>Eubacterium fissicatena group</i> | -0.66 |       |       |
|                 |                       |                       | <i>Eubacterium hallii group</i>      | -0.62 |       |       |
|                 |                       |                       | <i>Lachnoclostridium</i>             | -0.61 |       |       |
|                 |                       |                       | <i>Ruminococcus torques group</i>    | -0.63 |       |       |
|                 |                       | Peptostreptococcaceae | <i>Romboutsia</i>                    | 0.61  | 0.62  | 0.68  |
|                 |                       | Ruminococcaceae       | <i>Butyricoccus</i>                  |       |       | -0.68 |
|                 |                       |                       | <i>Faecalibacterium</i>              |       |       | -0.61 |
|                 |                       |                       | <i>Hydrogenoanaerobacterium</i>      |       |       | -0.78 |
|                 |                       |                       | <i>Oscillospira</i>                  |       |       | 0.81  |
|                 |                       |                       | <i>Ruminococcaceae UCG-008</i>       |       | 0.73  | 0.77  |
|                 |                       |                       | <i>Ruminococcaceae UCG-010</i>       |       |       | 0.59  |
|                 |                       |                       | <i>Ruminococcaceae UCG-014</i>       | -0.78 |       |       |
|                 |                       |                       | <i>Ruminococcus 2</i>                |       |       | 0.72  |
|                 | Erysipelotrichales    | Erysipelotrichaceae   | <i>Turicibacter</i>                  | 0.72  | 0.67  | 0.77  |
| Proteobacteria  | Rhizobiales           | Rhizobiaceae          | <i>Ochrobactrum</i>                  |       | -0.8  |       |
|                 | Rhodospirillales      | uncultured            | <i>Azospirillum sp. 47 25</i>        |       |       | 0.76  |
|                 | Desulfovibrionales    | Desulfovibrionaceae   | <i>Bilophila</i>                     |       |       | 0.78  |
|                 | Betaproteobacteriales | Burkholderiaceae      | <i>Delftia</i>                       |       | -0.72 |       |
|                 |                       |                       | <i>Parasutterella</i>                |       |       | 0.85  |
|                 | Enterobacteriales     | Enterobacteriaceae    | <i>Serratia</i>                      |       | -0.81 |       |
|                 | Pseudomonadales       | Pseudomonadaceae      | <i>Pseudomonas</i>                   |       | -0.72 |       |
|                 | Xanthomonadales       | Xanthomonadaceae      | <i>Stenotrophomonas</i>              |       | -0.71 |       |
| Verrucomicrobia | Verrucomicrobiales    | Akkermansiaceae       | <i>Akkermansia</i>                   | -0.75 |       |       |

Table shows only strong  $R > 0.6$  correlation coefficients based on Spearman's rank correlation (Spearman's rho).
